# Supplementary material for: Unbound Plasma, Total Plasma, and Whole-Blood Tacrolimus Pharmacokinetics Early After Thoracic Organ Transplantation
Source: PubMed Central journal article supplement — Clin Pharmacokinet. 2019 Dec 16;59(6):771–80. doi: 10.1007/s40262-019-00854-1 (PMC7292814; doi:10.1007/s40262-019-00854-1), 2019-12-16
Supplement: 40262_2019_854_MOESM1_ESM.pdf [file 40262_2019_854_MOESM1_ESM.pdf]

## **Supplementary Materials**

### **Unbound plasma, total plasma and whole-blood tacrolimus pharmacokinetics early after thoracic organ transplantation**

Maaïke A Sikma, MD, Erik M van Maarseveen, PharmD PhD, Claudine C Hunault, MD PhD, Javier M Moreno PharmD PhD, Ed A van de Graaf, MD PhD, Johannes H Kirkels, MD PhD, Prof Marianne C Verhaar, MD PhD, Prof Jan C Grutters, MD PhD, Prof Jozef Kesecioglu, MD PhD, Prof Dylan W de Lange, MD PhD, Prof Alwin D R Huitema, PharmD PhD

#### **ADDRESS FOR CORRESPONDENCE**

M A Sikma, MD

Dutch Poisons Information Center and Department of Intensive Care

Division of Anesthesiology, Intensive Care and Emergency Medicine

University Medical Center Utrecht

F06.149,

P.O. Box 85500,

3508 GA Utrecht

The Netherlands

Phone: 0031(0)887558561,

Fax: 0031(0)302541511

Email: [m.a.sikma@umcutrecht.nl](mailto:m.a.sikma@umcutrecht.nl)

**Table S1.** (Parameters displayed per day)

| <b>Parameters</b>                                                                             | <b>N=30(%)</b> | <b>Median (Q1;Q3)</b> |
|-----------------------------------------------------------------------------------------------|----------------|-----------------------|
| <b>Hematocrit</b>                                                                             |                |                       |
| Day 1                                                                                         |                | 0.31 (0.28;0.35)      |
| Day 2                                                                                         |                | 0.28 (0.25;0.30)      |
| Day 3                                                                                         |                | 0.27 (0.25;0.28)      |
| Day 4                                                                                         |                | 0.27 (0.25;0.29)      |
| Day 5                                                                                         |                | 0.27 (0.24;0.30)      |
| Day 6                                                                                         |                | 0.28 (0.27;0.29)      |
| <b>Albumin (g/L)</b>                                                                          |                |                       |
| Day 1                                                                                         |                | 26.2 (22.5;29.3)      |
| Day 2                                                                                         |                | 25.7 (22.2;28.2)      |
| Day 3                                                                                         |                | 25.3 (23.0;26.6)      |
| Day 4                                                                                         |                | 24.9 (22.6;27.1)      |
| Day 5                                                                                         |                | 24.3 (22.5;26.9)      |
| Day 6                                                                                         |                | 24.0 (22.8;25.4)      |
| <b>High Density Lipoprotein (mmol/L)</b>                                                      |                |                       |
| Day 1                                                                                         |                | 0.84 (0.70;1.06)      |
| Day 2                                                                                         |                | 0.89 (0.73;1.09)      |
| Day 3                                                                                         |                | 0.89 (0.76;1.04)      |
| Day 4                                                                                         |                | 0.93 (0.75;1.05)      |
| Day 5                                                                                         |                | 0.94 (0.80;1.01)      |
| Day 6                                                                                         |                | 0.96 (0.83;1.11)      |
| <b>α1-acid glycoprotein (g/L)</b>                                                             |                |                       |
| Day 1                                                                                         |                | 0.89 (0.76;1.18)      |
| Day 2                                                                                         |                | 1.37 (1.07;1.55)      |
| Day 3                                                                                         |                | 1.66 (1.37;2.04)      |
| Day 4                                                                                         |                | 1.79 (1.64;2.27)      |
| Day 5                                                                                         |                | 1.82 (1.67;2.24)      |
| Day 6                                                                                         |                | 1.90 (1.30;2.11)      |
| <b>pH</b>                                                                                     |                |                       |
| Day 1                                                                                         |                | 7.39 (7.33;7.43)      |
| Day 2                                                                                         |                | 7.40 (7.38;7.43)      |
| Day 3                                                                                         |                | 7.43 (7.39;7.46)      |
| Day 4                                                                                         |                | 7.44 (7.40;7.46)      |
| Day 5                                                                                         |                | 7.46 (7.45;7.48)      |
| Day 6                                                                                         |                | 7.47 (7.44;7.50)      |
| <b>Administration of packed red blood cells (ml/day) among patients receiving transfusion</b> |                |                       |
| Day 1                                                                                         |                | 550 (275;825)         |
| Day 2                                                                                         |                | 275 (275;688)         |
| Day 3                                                                                         |                | 275 (275;275)         |
| Day 4                                                                                         |                | 275 (275;275)         |
| Day 5                                                                                         |                | 413 (275;413)         |
| Day 6                                                                                         |                | 275 (275;1100)        |
| <b>SOFA scores per day</b>                                                                    |                |                       |
| Day 1                                                                                         |                | 9 (7;17)              |
| Day 2                                                                                         |                | 8 (5;10)              |
| Day 3                                                                                         |                | 5 (3;8)               |
| Day 4                                                                                         |                | 5 (3;15)              |
| Day 5                                                                                         |                | 4 (3;11)              |
| Day 6                                                                                         |                | 4 (2;9)               |
| <b>Frequency of Ileus per day</b>                                                             |                |                       |
| Day 1                                                                                         | 27 (90%)       |                       |
| Day 2                                                                                         | 24 (80%)       |                       |
| Day 3                                                                                         | 14 (47%)       |                       |
| Day 4                                                                                         | 5 (17%)        |                       |
| Day 5                                                                                         | 2 (7%)         |                       |
| Day 6                                                                                         | 2 (7%)         |                       |
| <b>Frequency of diarrhea per day</b>                                                          |                |                       |
| Day 1                                                                                         | 0 (0%)         |                       |
| Day 2                                                                                         | 2 (7%)         |                       |
| Day 3                                                                                         | 8 (27%)        |                       |
| Day 4                                                                                         | 9 (30%)        |                       |
| Day 5                                                                                         | 11 (37%)       |                       |
| Day 6                                                                                         | 10 (33%)       |                       |

|                                                                   |           |             |
|-------------------------------------------------------------------|-----------|-------------|
| Frequency of liver dysfunction per day                            |           |             |
| Day 1                                                             | 7 (23%)   |             |
| Day 2                                                             | 6 (20%)   |             |
| Day 3                                                             | 3 (10%)   |             |
| Day 4                                                             | 3 (13%)   |             |
| Day 5                                                             | 7 (23%)   |             |
| Day 6                                                             | 6 (20%)   |             |
| Frequency of ECMO use per day                                     |           |             |
| Day 1                                                             | 8 (27%)   |             |
| Day 2                                                             | 7 (23%)   |             |
| Day 3                                                             | 5 (17%)   |             |
| Day 4                                                             | 4 (13%)   |             |
| Day 5                                                             | 3 (10%)   |             |
| Day 6                                                             | 3 (10%)   |             |
| Number of drugs increasing tacrolimus concentration (min-max)     |           |             |
| Day 1                                                             |           | 2 (1-4)     |
| Day 2                                                             |           | 1 (0-2)     |
| Day 3                                                             |           | 1 (0-4)     |
| Day 4                                                             |           | 1 (0-5)     |
| Day 5                                                             |           | 0 (0-6)     |
| Day 6                                                             |           | 1 (0-4)     |
| Number of patients with drugs increasing tacrolimus concentration |           |             |
| Day 1                                                             | 30 (100%) |             |
| Day 2                                                             | 23 (77%)  |             |
| Day 3                                                             | 23 (77%)  |             |
| Day 4                                                             | 17 (57%)  |             |
| Day 5                                                             | 14 (47%)  |             |
| Day 6                                                             | 16 (53%)  |             |
| Number of drugs decreasing tacrolimus concentration (min-max)     |           |             |
| Day 1                                                             |           | 0 (0-0)     |
| Day 2                                                             |           | 1 (1-2)     |
| Day 3                                                             |           | 1 (0-1)     |
| Day 4                                                             |           | 1 (0-1)     |
| Day 5                                                             |           | 1 (0-1)     |
| Day 6                                                             |           | 1 (0-1)     |
| Number of patients with drugs decreasing tacrolimus concentration |           |             |
| Day 1                                                             | 0 (0%)    |             |
| Day 2                                                             | 30 (100%) |             |
| Day 3                                                             | 26 (87%)  |             |
| Day 4                                                             | 21 (70%)  |             |
| Day 5                                                             | 18 (60%)  |             |
| Day 6                                                             | 18 (60%)  |             |
| Renal function                                                    |           |             |
| Baseline Creatinine clearance<br>(ml/min/1.73m <sup>2</sup> )     |           | 85 (73;116) |
| Pharmacogenetic analyses                                          |           |             |
| Slow metabolizers of CYP 3A5                                      | 21 (70%)  |             |
| Slow metabolizers of CYP3A4                                       |           |             |
| Homozygosity CYP3A4*22                                            | 0 (0%)    |             |
| Heterozygosity and Homozygosity of<br>POR*28                      | 18 (60%)  |             |
| PPAR $\alpha$                                                     | 16 (53%)  |             |
| Decreased ABCB1 activity                                          |           |             |
| Decreased PXR activity                                            | 18 (60%)  |             |
| G1199A homozygosity                                               | 0 (0%)    |             |
| C1236T homozygosity                                               | 6 (20%)   |             |
| G2677T homozygosity                                               | 8 (27%)   |             |
| C3435T homozygosity                                               | 8 (27%)   |             |
| OATP1B1 homozygosity                                              | 0 (0%)    |             |
